# Supplementary material for: On the mechanism of carbonyl hydrogenation catalyzed by iron catalyst
Source: Royal Society of Chemistry journal article supplement (doi:10.1039/b919779f), 2010-01-01
Supplement: b919779f.pdf [file b919779f.pdf]

## Supporting Information

for

### On the mechanism of carbonyl hydrogenation catalyzed by iron catalyst

Honghong Zhang, Dezhan Chen\*, Yuhua Zhang, Guiqiu Zhang, Jianbiao Liu

**Cartesian coordinates of all relevant complexes optimized at  
B3LYP/BSI level.**

#### Cat (Figure 2)

| Atom | X         | Y         | Z         |
|------|-----------|-----------|-----------|
| C    | -0.347264 | 3.186464  | -0.750341 |
| C    | 1.004506  | 3.002798  | -1.456930 |
| C    | 1.744945  | 1.739190  | -0.973895 |
| C    | 0.796269  | 0.568477  | -0.846596 |
| C    | -0.610198 | 0.697032  | -0.895090 |
| C    | -1.301498 | 2.023116  | -1.069176 |
| C    | 1.135636  | -0.844037 | -0.737976 |
| C    | -0.112381 | -1.547439 | -0.807789 |
| C    | -1.205543 | -0.632537 | -0.829008 |
| H    | -0.806988 | 4.132748  | -1.054858 |
| H    | -0.190622 | 3.241139  | 0.334777  |
| H    | 1.641211  | 3.880222  | -1.301810 |
| H    | 0.830503  | 2.928325  | -2.538838 |
| H    | 2.243569  | 1.939369  | -0.018612 |
| H    | 2.541112  | 1.486586  | -1.685880 |
| H    | -1.638995 | 2.106162  | -2.113069 |

Electronic Supplementary Information for Dalton Transactions  
This journal is © The Royal Society of Chemistry 2010

|    |           |           |           |
|----|-----------|-----------|-----------|
| H  | -2.203547 | 2.079946  | -0.451463 |
| Fe | -0.050751 | -0.259637 | 0.936662  |
| O  | -0.305692 | -2.885113 | -0.866840 |
| H  | 0.479894  | -3.344470 | -0.537409 |
| H  | -0.115372 | -1.508649 | 1.742723  |
| C  | 1.214126  | 0.216330  | 2.058890  |
| C  | -1.367360 | 0.270386  | 1.971346  |
| O  | 2.062402  | 0.501756  | 2.788269  |
| O  | -2.248010 | 0.583339  | 2.648738  |
| Si | 2.827906  | -1.628278 | -0.690747 |
| Si | -3.011899 | -1.123779 | -0.910080 |
| H  | 2.661886  | -3.046943 | -0.262734 |
| H  | 3.463717  | -1.632360 | -2.035984 |
| H  | 3.729987  | -0.935616 | 0.260164  |
| H  | -3.291003 | -2.267134 | -0.010911 |
| H  | -3.842148 | 0.040920  | -0.508646 |
| H  | -3.384815 | -1.499426 | -2.301033 |

**Int1a (Figure 2)**

| Atom | X         | Y         | Z         |
|------|-----------|-----------|-----------|
| C    | 2.690265  | -0.569002 | -0.581649 |
| C    | 2.555564  | 0.814754  | -0.324609 |
| C    | 1.470682  | -1.040443 | -1.216932 |
| C    | 0.650054  | 0.115725  | -1.419347 |
| C    | 1.258809  | 1.268373  | -0.820684 |
| Fe   | 1.007389  | -0.222304 | 0.701908  |
| O    | -0.500093 | 0.042221  | -2.113437 |
| H    | -1.171337 | 0.682692  | -1.784602 |
| H    | -0.464845 | -0.394265 | 0.817023  |
| C    | 1.088989  | -1.690518 | 1.655665  |
| C    | 0.822024  | 0.850793  | 2.077009  |
| O    | 1.119920  | -2.673338 | 2.263137  |
| O    | 0.662587  | 1.578988  | 2.960183  |
| C    | -3.477944 | 1.561143  | -0.440635 |

Electronic Supplementary Information for Dalton Transactions  
This journal is © The Royal Society of Chemistry 2010

|    |           |           |           |
|----|-----------|-----------|-----------|
| C  | -4.181129 | 2.833456  | -0.012041 |
| H  | -4.288306 | 2.871717  | 1.077036  |
| H  | -3.596599 | 3.688608  | -0.350610 |
| H  | -5.186703 | 2.888162  | -0.442742 |
| O  | -2.430741 | 1.653855  | -1.083157 |
| C  | 3.660723  | 1.642756  | 0.278769  |
| C  | 3.948783  | -1.351188 | -0.279697 |
| H  | 3.784577  | -2.039430 | 0.557258  |
| H  | 4.201347  | -1.980441 | -1.141698 |
| C  | 5.126805  | -0.408807 | 0.035241  |
| C  | 4.711593  | 0.747622  | 0.957078  |
| H  | 5.515432  | 0.010522  | -0.902781 |
| H  | 5.586226  | 1.349052  | 1.228138  |
| H  | 4.141189  | 2.222552  | -0.522982 |
| H  | 4.298553  | 0.343833  | 1.890712  |
| H  | 5.944584  | -0.982898 | 0.484119  |
| H  | 3.263119  | 2.377092  | 0.987387  |
| Si | 0.674731  | 3.049441  | -0.912106 |
| H  | -0.196634 | 3.456087  | 0.217888  |
| H  | 1.881626  | 3.919802  | -0.889505 |
| H  | -0.042989 | 3.272801  | -2.191109 |
| Si | 1.046531  | -2.755522 | -1.827337 |
| H  | 1.292120  | -2.878212 | -3.290710 |
| H  | 1.914141  | -3.743466 | -1.133592 |
| H  | -0.373635 | -3.091037 | -1.560893 |
| C  | -4.064963 | 0.242557  | -0.076451 |
| C  | -5.302723 | 0.149126  | 0.584434  |
| C  | -3.367835 | -0.937379 | -0.393134 |
| C  | -5.833490 | -1.094806 | 0.917546  |
| H  | -5.856733 | 1.045881  | 0.840235  |
| C  | -3.899670 | -2.178291 | -0.055083 |
| H  | -2.409946 | -0.875474 | -0.895651 |
| C  | -5.131977 | -2.259913 | 0.599073  |
| H  | -6.790849 | -1.155866 | 1.426156  |
| H  | -3.350521 | -3.082346 | -0.299602 |

H -5.544345 -3.229869 0.861976

### TS1a (Figure 2)

| Atom | X         | Y         | Z         |
|------|-----------|-----------|-----------|
| C    | 1.953852  | -1.187611 | -0.561230 |
| C    | 2.455629  | 0.142847  | -0.474596 |
| C    | 0.670681  | -1.149746 | -1.227770 |
| C    | 0.454460  | 0.217482  | -1.641581 |
| C    | 1.504691  | 1.049740  | -1.082696 |
| Fe   | 0.611905  | 0.035203  | 0.562701  |
| O    | -0.593167 | 0.614561  | -2.311220 |
| H    | -1.151364 | 1.409491  | -1.741623 |
| H    | -0.822735 | 0.769499  | 0.578986  |
| C    | 0.021037  | -1.243598 | 1.635399  |
| C    | 1.145119  | 1.098300  | 1.871067  |
| O    | -0.345728 | -2.097397 | 2.317861  |
| O    | 1.523270  | 1.798200  | 2.705909  |
| C    | -1.919837 | 1.591511  | 0.255196  |
| C    | -1.886827 | 2.511353  | 1.475456  |
| H    | -1.910613 | 1.967674  | 2.421620  |
| H    | -0.997129 | 3.141626  | 1.435638  |
| H    | -2.770959 | 3.156648  | 1.425269  |
| O    | -1.658350 | 2.189938  | -0.866984 |
| C    | 3.817177  | 0.460362  | 0.084328  |
| C    | 2.738858  | -2.394658 | -0.098210 |
| H    | 2.292050  | -2.819849 | 0.807890  |
| H    | 2.672233  | -3.179909 | -0.860229 |
| C    | 4.216821  | -2.040162 | 0.158560  |
| C    | 4.371876  | -0.711052 | 0.912513  |
| H    | 4.742841  | -1.964258 | -0.802713 |
| H    | 5.426351  | -0.527164 | 1.144105  |
| H    | 4.489242  | 0.656318  | -0.763809 |
| H    | 3.841831  | -0.767112 | 1.872416  |
| H    | 4.696062  | -2.853703 | 0.713337  |

|    |           |           |           |
|----|-----------|-----------|-----------|
| H  | 3.799083  | 1.383041  | 0.674103  |
| Si | 1.688849  | 2.899415  | -1.358192 |
| H  | 1.305166  | 3.698344  | -0.167314 |
| H  | 3.126186  | 3.177018  | -1.637303 |
| H  | 0.882382  | 3.314301  | -2.527062 |
| Si | -0.469960 | -2.557983 | -1.709647 |
| H  | -0.287653 | -2.894964 | -3.147085 |
| H  | -0.106821 | -3.755843 | -0.905701 |
| H  | -1.886760 | -2.211627 | -1.464256 |
| C  | -3.020169 | 0.542814  | 0.245325  |
| C  | -3.331205 | -0.224206 | 1.378141  |
| C  | -3.777262 | 0.369262  | -0.920279 |
| C  | -4.375514 | -1.145546 | 1.345106  |
| H  | -2.749608 | -0.112542 | 2.288273  |
| C  | -4.825292 | -0.551734 | -0.952457 |
| H  | -3.544279 | 0.972621  | -1.789998 |
| C  | -5.126746 | -1.312025 | 0.177862  |
| H  | -4.603277 | -1.734633 | 2.228830  |
| H  | -5.406819 | -0.672918 | -1.861902 |
| H  | -5.941677 | -2.029798 | 0.152732  |

### Int2a (Figure 2)

| Atom | X         | Y         | Z         |
|------|-----------|-----------|-----------|
| C    | 1.905235  | -1.174099 | -0.619526 |
| C    | 2.436009  | 0.157282  | -0.536555 |
| C    | 0.603347  | -1.109800 | -1.218473 |
| C    | 0.405788  | 0.269807  | -1.703739 |
| C    | 1.482999  | 1.079920  | -1.089205 |
| Fe   | 0.668235  | 0.045688  | 0.582638  |
| O    | -0.590224 | 0.681805  | -2.340003 |
| H    | -1.434389 | 1.775340  | -1.400425 |
| H    | -0.954647 | 0.813536  | 0.636124  |
| C    | 0.237377  | -1.267104 | 1.707134  |
| C    | 1.274127  | 1.132446  | 1.857699  |

Electronic Supplementary Information for Dalton Transactions  
This journal is © The Royal Society of Chemistry 2010

|    |           |           |           |
|----|-----------|-----------|-----------|
| O  | 0.008805  | -2.150455 | 2.411651  |
| O  | 1.722686  | 1.829670  | 2.657688  |
| C  | -1.909573 | 1.464449  | 0.468636  |
| C  | -2.037430 | 2.319207  | 1.730002  |
| H  | -2.129310 | 1.699487  | 2.625176  |
| H  | -1.168418 | 2.974144  | 1.829026  |
| H  | -2.933923 | 2.940011  | 1.643390  |
| O  | -1.721272 | 2.306209  | -0.610216 |
| C  | 3.830557  | 0.437584  | -0.044652 |
| C  | 2.701924  | -2.395345 | -0.216130 |
| H  | 2.300829  | -2.829235 | 0.706653  |
| H  | 2.577828  | -3.167063 | -0.984478 |
| C  | 4.196952  | -2.066406 | -0.036867 |
| C  | 4.411209  | -0.755178 | 0.732971  |
| H  | 4.670008  | -1.978319 | -1.024195 |
| H  | 5.478765  | -0.589025 | 0.911369  |
| H  | 4.456103  | 0.634678  | -0.927735 |
| H  | 3.932572  | -0.823126 | 1.718666  |
| H  | 4.693754  | -2.897754 | 0.474133  |
| H  | 3.861576  | 1.353015  | 0.555712  |
| Si | 1.687660  | 2.930651  | -1.335422 |
| H  | 1.501898  | 3.684303  | -0.068611 |
| H  | 3.077639  | 3.193013  | -1.807176 |
| H  | 0.733848  | 3.414430  | -2.356197 |
| Si | -0.579644 | -2.492079 | -1.666782 |
| H  | -0.462333 | -2.818852 | -3.113251 |
| H  | -0.209624 | -3.705548 | -0.887722 |
| H  | -1.978425 | -2.124122 | -1.358709 |
| C  | -3.056193 | 0.472812  | 0.302129  |
| C  | -3.260397 | -0.550444 | 1.238595  |
| C  | -3.944046 | 0.594712  | -0.771626 |
| C  | -4.329465 | -1.434102 | 1.104934  |
| H  | -2.578789 | -0.663673 | 2.077669  |
| C  | -5.015488 | -0.291382 | -0.906808 |
| H  | -3.795083 | 1.390078  | -1.493103 |

|   |           |           |           |
|---|-----------|-----------|-----------|
| C | -5.211911 | -1.306988 | 0.028369  |
| H | -4.472445 | -2.223061 | 1.837895  |
| H | -5.695764 | -0.185472 | -1.747099 |
| H | -6.044083 | -1.996735 | -0.079154 |

### Int3a (Figure 2)

| Atom | X         | Y         | Z         |
|------|-----------|-----------|-----------|
| Fe   | -0.337036 | -0.036752 | -0.132491 |
| Si   | -2.083484 | 3.148675  | -0.124251 |
| Si   | -1.022252 | -1.704048 | 2.938217  |
| O    | -1.035547 | 1.518159  | 2.508884  |
| O    | 1.071960  | 0.815518  | 1.133949  |
| O    | 0.969965  | -2.632039 | -0.565706 |
| O    | 0.361422  | 1.082389  | -2.753218 |
| C    | -1.557037 | 0.832510  | 1.586939  |
| C    | -1.957650 | 1.324427  | 0.260941  |
| C    | -2.425964 | 0.193260  | -0.500062 |
| C    | -3.166271 | 0.191036  | -1.820691 |
| C    | -3.869161 | -1.156153 | -2.078296 |
| C    | -2.976594 | -2.351232 | -1.714166 |
| C    | -2.650220 | -2.352492 | -0.212019 |
| C    | -2.187884 | -0.997385 | 0.255197  |
| C    | -1.564843 | -0.638165 | 1.503015  |
| C    | 2.355761  | 1.462332  | 0.933399  |
| C    | 3.265248  | 0.480108  | 0.217144  |
| C    | 3.659576  | -0.679984 | 0.901698  |
| C    | 4.489366  | -1.620408 | 0.296020  |
| C    | 4.944657  | -1.412588 | -1.009152 |
| C    | 4.564438  | -0.260889 | -1.697137 |
| C    | 3.729532  | 0.680117  | -1.087639 |
| C    | 0.504601  | -1.593766 | -0.391776 |
| C    | 0.133238  | 0.642466  | -1.711552 |
| H    | 0.524858  | 1.276810  | 1.830354  |
| H    | -2.482110 | 0.419071  | -2.645641 |

|   |           |           |           |
|---|-----------|-----------|-----------|
| H | -3.904382 | 1.001258  | -1.815481 |
| H | -4.787828 | -1.206306 | -1.478223 |
| H | -4.178167 | -1.211302 | -3.127559 |
| H | -2.044464 | -2.305952 | -2.292721 |
| H | -3.470732 | -3.291142 | -1.982250 |
| H | -3.558043 | -2.606932 | 0.354739  |
| H | -1.915580 | -3.125737 | 0.032998  |
| H | 2.762980  | 1.609113  | 1.942994  |
| H | 3.304493  | -0.843228 | 1.915927  |
| H | 4.784213  | -2.512417 | 0.841099  |
| H | 5.594977  | -2.142210 | -1.482884 |
| H | 4.917435  | -0.089274 | -2.709964 |
| H | 3.448271  | 1.571977  | -1.637625 |
| H | -0.989047 | -3.128206 | 2.505183  |
| H | -1.974912 | -1.589741 | 4.074423  |
| H | 0.330999  | -1.322868 | 3.411432  |
| H | -0.818111 | 3.866902  | 0.159504  |
| H | -3.170510 | 3.778698  | 0.671507  |
| H | -2.405455 | 3.322853  | -1.567167 |
| C | 2.190864  | 2.830457  | 0.281735  |
| H | 3.161208  | 3.326864  | 0.180816  |
| H | 1.732303  | 2.758081  | -0.707671 |
| H | 1.548499  | 3.460337  | 0.902573  |

#### INT4 (Figure 2)

| Atom | X         | Y         | Z         |
|------|-----------|-----------|-----------|
| C    | -0.648389 | 3.116269  | -0.688755 |
| C    | 0.704088  | 3.070422  | -1.413535 |
| C    | 1.558936  | 1.873606  | -0.956660 |
| C    | 0.746296  | 0.603283  | -0.857836 |
| C    | -0.696838 | 0.604893  | -0.878448 |
| C    | -1.490418 | 1.874444  | -1.023965 |
| C    | 1.208515  | -0.741743 | -0.767135 |
| C    | 0.020533  | -1.626509 | -0.849056 |



|    |           |           |           |
|----|-----------|-----------|-----------|
| C  | -1.168063 | -0.741491 | -0.820338 |
| H  | -1.201640 | 4.018549  | -0.969422 |
| H  | -0.485145 | 3.168236  | 0.395680  |
| H  | 1.261406  | 3.998426  | -1.248956 |
| H  | 0.526045  | 3.000067  | -2.495066 |
| H  | 2.020692  | 2.095183  | 0.012399  |
| H  | 2.389944  | 1.712477  | -1.652476 |
| H  | -1.824481 | 1.936449  | -2.070477 |
| H  | -2.401406 | 1.834604  | -0.418825 |
| Fe | -0.026239 | -0.339352 | 0.898131  |
| O  | 0.017848  | -2.855534 | -0.657339 |
| C  | 1.255926  | 0.191864  | 2.022652  |
| C  | -1.364782 | 0.191058  | 1.951540  |
| O  | 2.102713  | 0.587676  | 2.696677  |
| O  | -2.246125 | 0.581841  | 2.582891  |
| Si | 2.945704  | -1.440597 | -0.701233 |
| Si | -2.907435 | -1.436104 | -0.839907 |
| H  | 3.113341  | -2.342427 | 0.463505  |
| H  | 3.245094  | -2.187914 | -1.949294 |
| H  | 3.910657  | -0.314706 | -0.578737 |
| H  | -3.119291 | -2.375712 | 0.287097  |
| H  | -3.876147 | -0.313343 | -0.717443 |
| H  | -3.162949 | -2.141359 | -2.122038 |

### TS1b (Figure 4)

| Atom | X         | Y         | Z         |
|------|-----------|-----------|-----------|
| C    | 1.963181  | -1.056673 | -0.604607 |
| C    | 2.430772  | 0.256571  | -0.306386 |
| C    | 0.734078  | -0.943558 | -1.358483 |
| C    | 0.522308  | 0.463510  | -1.602352 |
| C    | 1.511057  | 1.226419  | -0.862093 |
| Fe   | 0.514991  | -0.003852 | 0.557279  |
| O    | -0.485439 | 0.933128  | -2.289946 |
| H    | -1.079580 | 1.651287  | -1.680129 |

Electronic Supplementary Information for Dalton Transactions  
This journal is © The Royal Society of Chemistry 2010

|    |           |           |           |
|----|-----------|-----------|-----------|
| H  | -0.920848 | 0.729104  | 0.551969  |
| C  | -0.177972 | -1.410449 | 1.387686  |
| C  | 0.918521  | 0.872768  | 2.041979  |
| O  | -0.616324 | -2.342220 | 1.904152  |
| O  | 1.201157  | 1.458131  | 2.994009  |
| C  | -1.923747 | 1.629033  | 0.316946  |
| O  | -1.659807 | 2.322951  | -0.745208 |
| C  | 3.736977  | 0.509590  | 0.398145  |
| C  | 2.736187  | -2.306487 | -0.247090 |
| H  | 2.230779  | -2.855300 | 0.555789  |
| H  | 2.744726  | -2.982125 | -1.110328 |
| C  | 4.181861  | -1.973652 | 0.171004  |
| C  | 4.247617  | -0.756726 | 1.105811  |
| H  | 4.779347  | -1.762938 | -0.726187 |
| H  | 5.275602  | -0.594849 | 1.446816  |
| H  | 4.469717  | 0.824448  | -0.359117 |
| H  | 3.642483  | -0.947391 | 2.001849  |
| H  | 4.634075  | -2.849073 | 0.648878  |
| H  | 3.653233  | 1.345043  | 1.101058  |
| Si | 1.661640  | 3.101150  | -0.858007 |
| H  | 1.111879  | 3.715528  | 0.375184  |
| H  | 3.112752  | 3.435129  | -0.919605 |
| H  | 0.989752  | 3.658293  | -2.052650 |
| Si | -0.345397 | -2.285120 | -2.101249 |
| H  | -0.102838 | -2.391024 | -3.564437 |
| H  | 0.018352  | -3.583918 | -1.474566 |
| H  | -1.779818 | -2.010994 | -1.859868 |
| C  | -3.113676 | 0.706050  | 0.338008  |
| C  | -3.594703 | 0.213537  | 1.558172  |
| C  | -3.762107 | 0.357130  | -0.852468 |
| C  | -4.709498 | -0.622036 | 1.589894  |
| H  | -3.096786 | 0.492321  | 2.484837  |
| C  | -4.877319 | -0.479639 | -0.819916 |
| H  | -3.390940 | 0.755226  | -1.790481 |
| C  | -5.351637 | -0.971943 | 0.398518  |

|   |           |           |           |
|---|-----------|-----------|-----------|
| H | -5.080801 | -0.995811 | 2.539728  |
| H | -5.380171 | -0.744600 | -1.745587 |
| H | -6.221956 | -1.621527 | 0.421364  |
| H | -1.774233 | 2.152298  | 1.275129  |

### Int5 (Figure 6)

| Atom | X         | Y         | Z         |
|------|-----------|-----------|-----------|
| C    | -0.707129 | 2.801755  | -1.394272 |
| C    | 0.649305  | 2.594994  | -2.084241 |
| C    | 1.532248  | 1.571223  | -1.342606 |
| C    | 0.736372  | 0.365571  | -0.888923 |
| C    | -0.700638 | 0.331430  | -0.910601 |
| C    | -1.522090 | 1.498311  | -1.390933 |
| C    | 1.215172  | -0.926297 | -0.486039 |
| C    | 0.065678  | -1.878340 | -0.606882 |
| C    | -1.134776 | -0.988433 | -0.540202 |
| H    | -1.275742 | 3.586267  | -1.904508 |
| H    | -0.550875 | 3.144116  | -0.362909 |
| H    | 1.187425  | 3.544965  | -2.167755 |
| H    | 0.472613  | 2.245106  | -3.110105 |
| H    | 2.027223  | 2.049274  | -0.490657 |
| H    | 2.339035  | 1.230015  | -2.001608 |
| H    | -1.843912 | 1.272744  | -2.418396 |
| H    | -2.439420 | 1.602533  | -0.803142 |
| Fe   | -0.027791 | -0.061327 | 1.017448  |
| O    | 0.100139  | -3.102946 | -0.607577 |
| C    | 1.227341  | 0.907879  | 1.851019  |
| C    | -1.380209 | 0.835353  | 1.773876  |
| O    | 2.051213  | 1.542332  | 2.344377  |
| O    | -2.265342 | 1.419201  | 2.221386  |
| Si   | 2.975349  | -1.540348 | -0.310109 |

Electronic Supplementary Information for Dalton Transactions  
This journal is © The Royal Society of Chemistry 2010

|    |           |           |           |
|----|-----------|-----------|-----------|
| Si | -2.866820 | -1.692661 | -0.455586 |
| H  | 3.066710  | -2.532235 | 0.787756  |
| H  | 3.451458  | -2.163290 | -1.573496 |
| H  | 3.864648  | -0.389118 | 0.004918  |
| H  | -2.959594 | -2.703250 | 0.625117  |
| H  | -3.828695 | -0.593308 | -0.168649 |
| H  | -3.252035 | -2.320695 | -1.747143 |
| H  | 0.389442  | -1.325785 | 2.029833  |
| H  | -0.420877 | -1.340086 | 2.020162  |

**TS2** (Figure 6)

| Atom | X         | Y         | Z         |
|------|-----------|-----------|-----------|
| C    | -0.656594 | 3.187157  | -0.560856 |
| C    | 0.694745  | 3.171091  | -1.290105 |
| C    | 1.555575  | 1.957704  | -0.888414 |
| C    | 0.734743  | 0.689848  | -0.822434 |
| C    | -0.691555 | 0.689104  | -0.842701 |
| C    | -1.497646 | 1.956053  | -0.935506 |
| C    | 1.200722  | -0.683698 | -0.810466 |
| C    | 0.021332  | -1.532793 | -0.900608 |
| C    | -1.160503 | -0.685302 | -0.862470 |
| H    | -1.211470 | 4.098123  | -0.808524 |
| H    | -0.490806 | 3.201864  | 0.524575  |
| H    | 1.250362  | 4.093427  | -1.091118 |
| H    | 0.512242  | 3.143418  | -2.372741 |
| H    | 2.046639  | 2.147069  | 0.072877  |
| H    | 2.366379  | 1.815845  | -1.612048 |
| H    | -1.843649 | 2.054617  | -1.975156 |
| H    | -2.402595 | 1.892673  | -0.323000 |
| Fe   | -0.022681 | -0.367176 | 0.887338  |
| O    | 0.017862  | -2.811178 | -0.652481 |
| H    | -0.034470 | -1.948832 | 1.523138  |
| C    | 1.285103  | 0.165548  | 1.993986  |
| C    | -1.384047 | 0.165828  | 1.925156  |
| O    | 2.152712  | 0.498703  | 2.670181  |

|    |           |           |           |
|----|-----------|-----------|-----------|
| O  | -2.284385 | 0.494459  | 2.559534  |
| Si | 2.935229  | -1.396281 | -0.821594 |
| Si | -2.893406 | -1.394442 | -0.955737 |
| H  | 3.158860  | -2.333645 | 0.303521  |
| H  | 3.182751  | -2.099941 | -2.105832 |
| H  | 3.903248  | -0.271932 | -0.702450 |
| H  | -3.159294 | -2.361446 | 0.134511  |
| H  | -3.865979 | -0.273169 | -0.844883 |
| H  | -3.093315 | -2.063558 | -2.266609 |
| H  | -0.015472 | -2.416946 | 0.704214  |

**Int6a (Figure 7)**

| Atom | X         | Y         | Z         |
|------|-----------|-----------|-----------|
| C    | 2.921244  | 0.489249  | 0.037309  |
| C    | 2.399928  | -0.511160 | 0.920901  |
| C    | 1.969385  | 1.561918  | -0.042281 |
| C    | 0.981650  | 1.364296  | 1.049823  |
| C    | 1.128798  | -0.065435 | 1.437082  |
| Fe   | 1.091506  | -0.275268 | -0.678854 |
| O    | 0.113953  | 2.173933  | 1.411042  |
| H    | -1.498098 | 1.364511  | 1.207772  |
| H    | -3.266012 | 2.183220  | -0.046638 |
| C    | 1.676441  | -0.288188 | -2.370691 |
| C    | 0.610670  | -2.000485 | -0.689839 |
| O    | 2.092176  | -0.283082 | -3.443942 |
| O    | 0.326436  | -3.113751 | -0.650284 |
| C    | -3.384125 | 1.308468  | 0.612762  |
| C    | -3.987214 | 1.784643  | 1.942868  |
| H    | -3.323098 | 2.509993  | 2.425650  |
| H    | -4.959999 | 2.261387  | 1.785309  |
| H    | -4.123514 | 0.933707  | 2.617081  |
| O    | -2.113983 | 0.699350  | 0.832826  |
| C    | 3.187887  | -1.736008 | 1.302400  |
| C    | 4.299682  | 0.397539  | -0.581391 |
| H    | 4.230168  | 0.227993  | -1.661005 |

Electronic Supplementary Information for Dalton Transactions  
This journal is © The Royal Society of Chemistry 2010

|    |           |           |           |
|----|-----------|-----------|-----------|
| H  | 4.798877  | 1.366524  | -0.465604 |
| C  | 5.148332  | -0.709713 | 0.075435  |
| C  | 4.341527  | -1.993678 | 0.319213  |
| H  | 5.533804  | -0.347782 | 1.037949  |
| H  | 4.991845  | -2.779974 | 0.716594  |
| H  | 3.597995  | -1.567574 | 2.308766  |
| H  | 3.939966  | -2.365576 | -0.632738 |
| H  | 6.021750  | -0.917391 | -0.551535 |
| H  | 2.538564  | -2.613755 | 1.385852  |
| Si | 0.109892  | -0.906579 | 2.776269  |
| H  | -0.765531 | -1.977922 | 2.239409  |
| H  | 1.055165  | -1.548477 | 3.735260  |
| H  | -0.693631 | 0.097565  | 3.505243  |
| Si | 2.056045  | 3.167513  | -1.000405 |
| H  | 2.563690  | 4.273100  | -0.145267 |
| H  | 2.993374  | 2.995951  | -2.143774 |
| H  | 0.720228  | 3.535603  | -1.527557 |
| H  | -0.268058 | 0.437153  | -1.334872 |
| H  | -0.576408 | 0.169666  | -0.638580 |
| C  | -4.289673 | 0.311853  | -0.088662 |
| C  | -5.311614 | 0.766113  | -0.931370 |
| C  | -4.151546 | -1.065538 | 0.122588  |
| C  | -6.183333 | -0.133249 | -1.546509 |
| H  | -5.423135 | 1.833325  | -1.111331 |
| C  | -5.019420 | -1.967248 | -0.496335 |
| H  | -3.356793 | -1.423200 | 0.768512  |
| C  | -6.038922 | -1.505159 | -1.330879 |
| H  | -6.969144 | 0.236647  | -2.199466 |
| H  | -4.898356 | -3.033725 | -0.325855 |
| H  | -6.712772 | -2.207994 | -1.812752 |

**TS3a (Figure 7)**

| Atom | X        | Y        | Z        |
|------|----------|----------|----------|
| C    | 2.684176 | 0.779688 | 0.168087 |

Electronic Supplementary Information for Dalton Transactions  
This journal is © The Royal Society of Chemistry 2010

|    |           |           |           |
|----|-----------|-----------|-----------|
| C  | 2.697524  | -0.630617 | 0.387534  |
| C  | 1.532825  | 1.336029  | 0.838931  |
| C  | 0.951477  | 0.272425  | 1.667426  |
| C  | 1.564834  | -0.983906 | 1.216994  |
| Fe | 0.943888  | -0.111637 | -0.631261 |
| O  | -0.009383 | 0.402277  | 2.479814  |
| H  | -1.295022 | -0.185966 | 1.847281  |
| H  | -2.563517 | 1.528805  | 0.817650  |
| C  | 0.903669  | 0.973242  | -2.041861 |
| C  | 0.915320  | -1.610522 | -1.593766 |
| O  | 0.897576  | 1.697611  | -2.937468 |
| O  | 0.919121  | -2.592516 | -2.195170 |
| C  | -3.014748 | 0.571123  | 1.110896  |
| O  | -1.976233 | -0.439184 | 1.134335  |
| C  | 3.822878  | -1.509715 | -0.091062 |
| C  | 3.792005  | 1.509240  | -0.561162 |
| H  | 3.440575  | 1.880752  | -1.530016 |
| H  | 4.066694  | 2.399868  | 0.016074  |
| C  | 5.030829  | 0.612261  | -0.755851 |
| C  | 4.653851  | -0.814238 | -1.181742 |
| H  | 5.592125  | 0.561069  | 0.186878  |
| H  | 5.556618  | -1.400473 | -1.383907 |
| H  | 4.469794  | -1.725563 | 0.772282  |
| H  | 4.080021  | -0.781898 | -2.117208 |
| H  | 5.699680  | 1.069920  | -1.492425 |
| H  | 3.448017  | -2.478107 | -0.437226 |
| Si | 1.111610  | -2.651337 | 1.932161  |
| H  | 1.705793  | -3.724191 | 1.089801  |
| H  | 1.648088  | -2.799261 | 3.312437  |
| H  | -0.359085 | -2.830592 | 1.970037  |
| Si | 0.969615  | 3.112570  | 0.974295  |
| H  | 1.370624  | 3.707489  | 2.277326  |
| H  | 1.597609  | 3.911316  | -0.112920 |
| H  | -0.505012 | 3.217141  | 0.842218  |
| H  | -0.661300 | -0.027968 | -0.677250 |

|   |           |           |           |
|---|-----------|-----------|-----------|
| H | -1.108881 | -0.260869 | 0.072969  |
| C | -3.596010 | 0.706736  | 2.520392  |
| H | -4.377334 | 1.472343  | 2.532308  |
| H | -4.036808 | -0.241324 | 2.842177  |
| H | -2.814486 | 0.995915  | 3.229964  |
| C | -4.052572 | 0.176789  | 0.080341  |
| C | -4.679139 | 1.160338  | -0.693652 |
| C | -4.433916 | -1.161542 | -0.081648 |
| C | -5.676197 | 0.817308  | -1.608281 |
| H | -4.383737 | 2.201180  | -0.581885 |
| C | -5.424835 | -1.505999 | -1.001266 |
| H | -3.941108 | -1.929014 | 0.506645  |
| C | -6.050897 | -0.518022 | -1.764741 |
| C | -6.152520 | 1.591331  | -2.203312 |
| C | -5.708198 | -2.547798 | -1.122387 |
| C | -6.821949 | -0.788023 | -2.480609 |

### Int7a (Figure 7)

| Atom | X         | Y         | Z         |
|------|-----------|-----------|-----------|
| C    | 2.912644  | 0.645250  | 0.173172  |
| C    | 2.751696  | -0.739905 | 0.418631  |
| C    | 1.803575  | 1.352840  | 0.790917  |
| C    | 1.030240  | 0.366975  | 1.481614  |
| C    | 1.547713  | -0.945586 | 1.213723  |
| Fe   | 1.055065  | -0.041521 | -0.661394 |
| O    | -0.001311 | 0.698677  | 2.281248  |
| H    | -0.812175 | 0.169312  | 2.063720  |
| H    | -2.794778 | 1.530520  | 0.920327  |
| C    | 0.953097  | 1.066470  | -2.023164 |
| C    | 0.808499  | -1.492814 | -1.625367 |
| O    | 0.867353  | 1.814012  | -2.898165 |
| O    | 0.631652  | -2.456087 | -2.236135 |
| C    | -3.242106 | 0.561536  | 1.183488  |



Electronic Supplementary Information for Dalton Transactions  
This journal is © The Royal Society of Chemistry 2010

|    |           |           |           |
|----|-----------|-----------|-----------|
| O  | -2.196774 | -0.431682 | 1.264386  |
| C  | 3.763868  | -1.768061 | -0.016146 |
| C  | 4.108416  | 1.223845  | -0.550062 |
| H  | 3.821981  | 1.580822  | -1.545948 |
| H  | 4.470578  | 2.104398  | -0.006529 |
| C  | 5.240163  | 0.184884  | -0.670840 |
| C  | 4.712164  | -1.197122 | -1.084074 |
| H  | 5.752563  | 0.093263  | 0.296489  |
| H  | 5.545361  | -1.890318 | -1.241807 |
| H  | 4.350548  | -2.067486 | 0.865142  |
| H  | 4.179372  | -1.115940 | -2.040524 |
| H  | 5.987364  | 0.540458  | -1.388385 |
| H  | 3.272240  | -2.676856 | -0.378449 |
| Si | 0.936750  | -2.555827 | 1.946385  |
| H  | 1.283397  | -3.678547 | 1.037482  |
| H  | 1.590461  | -2.805163 | 3.260418  |
| H  | -0.530766 | -2.516773 | 2.143944  |
| Si | 1.453971  | 3.191232  | 0.867605  |
| H  | 1.860854  | 3.747170  | 2.186055  |
| H  | 2.248087  | 3.873269  | -0.187716 |
| H  | 0.015228  | 3.475412  | 0.651453  |
| H  | -0.435059 | 0.086566  | -0.644560 |
| H  | -1.765904 | -0.488358 | 0.390667  |
| C  | -3.849720 | 0.659448  | 2.581686  |
| H  | -4.642718 | 1.412024  | 2.597053  |
| H  | -4.279602 | -0.302552 | 2.875753  |
| H  | -3.086102 | 0.942234  | 3.312864  |
| C  | -4.265520 | 0.192006  | 0.124092  |
| C  | -4.845352 | 1.184810  | -0.674191 |
| C  | -4.668258 | -1.139236 | -0.047929 |
| C  | -5.817891 | 0.858303  | -1.620852 |
| H  | -4.531282 | 2.219576  | -0.556728 |
| C  | -5.635042 | -1.467722 | -0.998326 |
| H  | -4.209599 | -1.914121 | 0.558874  |
| C  | -6.214822 | -0.469725 | -1.785188 |

|   |           |           |           |
|---|-----------|-----------|-----------|
| H | -6.257331 | 1.639079  | -2.235149 |
| H | -5.935507 | -2.503958 | -1.125890 |
| H | -6.966537 | -0.726692 | -2.525966 |

### Int6b (Figure 7)

| Atom | X         | Y         | Z         |
|------|-----------|-----------|-----------|
| C    | -2.842442 | 0.433244  | -0.140915 |
| C    | -2.307244 | -0.754352 | -0.770676 |
| C    | -1.915734 | 1.524245  | -0.360424 |
| C    | -0.919380 | 1.068226  | -1.369589 |
| C    | -1.049980 | -0.417995 | -1.418517 |
| Fe   | -0.934816 | -0.086501 | 0.706791  |
| O    | -0.035164 | 1.793752  | -1.933140 |
| H    | 1.546816  | 1.179414  | -1.615949 |
| H    | 3.387057  | 2.348371  | -0.533120 |
| C    | -1.461095 | 0.327507  | 2.361234  |
| C    | -0.408833 | -1.739546 | 1.134836  |
| O    | -1.847747 | 0.607678  | 3.436535  |
| O    | -0.086047 | -2.843441 | 1.376476  |
| C    | 3.500149  | 1.364207  | -1.016673 |
| O    | 2.221147  | 0.676276  | -1.077446 |
| C    | -3.073318 | -2.054270 | -0.823503 |
| C    | -4.210962 | 0.470702  | 0.512858  |
| C    | -4.124888 | 0.566507  | 1.602631  |
| C    | -4.737969 | 1.372380  | 0.172615  |
| C    | -5.048829 | -0.786778 | 0.160224  |
| C    | -4.209734 | -2.083195 | 0.225681  |
| H    | -5.456693 | -0.681506 | -0.856326 |
| H    | -4.850471 | -2.955478 | 0.044244  |
| H    | -3.509508 | -2.144807 | -1.831273 |
| H    | -3.784815 | -2.198568 | 1.233647  |
| H    | -5.905360 | -0.853160 | 0.843083  |
| H    | -2.407845 | -2.917669 | -0.700290 |
| Si   | -0.032690 | -1.536300 | -2.544020 |

Electronic Supplementary Information for Dalton Transactions  
This journal is © The Royal Society of Chemistry 2010

|    |           |           |           |
|----|-----------|-----------|-----------|
| H  | 0.857833  | -2.445160 | -1.781612 |
| H  | -0.977996 | -2.387726 | -3.318287 |
| H  | 0.761164  | -0.721392 | -3.485682 |
| Si | -2.084546 | 3.327749  | 0.134028  |
| H  | -2.658762 | 4.122430  | -0.982198 |
| H  | -3.007697 | 3.424754  | 1.294682  |
| H  | -0.771969 | 3.896499  | 0.515508  |
| H  | 0.485549  | 0.790115  | 1.121224  |
| H  | 0.797530  | 0.409727  | 0.489531  |
| H  | 3.875256  | 1.539468  | -2.039430 |
| C  | 4.506513  | 0.528865  | -0.244222 |
| C  | 4.284960  | -0.840803 | 0.001561  |
| C  | 5.701515  | 1.124182  | 0.216135  |
| C  | 5.245037  | -1.604361 | 0.693829  |
| H  | 3.362178  | -1.290282 | -0.350105 |
| C  | 6.663187  | 0.361855  | 0.904037  |
| H  | 5.881135  | 2.184267  | 0.039595  |
| C  | 6.437578  | -1.007958 | 1.145733  |
| H  | 5.062255  | -2.660866 | 0.878501  |
| H  | 7.579373  | 0.833074  | 1.253274  |
| H  | 7.178499  | -1.598419 | 1.679967  |

**TS3b (Figure 7)**

| Atom | X         | Y         | Z         |
|------|-----------|-----------|-----------|
| C    | -2.616724 | 0.693540  | -0.279585 |
| C    | -2.570689 | -0.733016 | -0.270812 |
| C    | -1.506163 | 1.182766  | -1.062140 |
| C    | -0.893789 | 0.025224  | -1.724974 |
| C    | -1.442247 | -1.167410 | -1.067440 |
| Fe   | -0.818217 | 0.013165  | 0.599544  |
| O    | 0.046173  | 0.063738  | -2.572087 |
| H    | 1.348869  | -0.370431 | -1.899571 |
| H    | 2.630458  | 1.510717  | -1.122249 |

Electronic Supplementary Information for Dalton Transactions  
This journal is © The Royal Society of Chemistry 2010

|    |           |           |           |
|----|-----------|-----------|-----------|
| C  | -0.795722 | 1.306844  | 1.821741  |
| C  | -0.689463 | -1.316891 | 1.777912  |
| O  | -0.800335 | 2.162808  | 2.592552  |
| O  | -0.627197 | -2.195081 | 2.520025  |
| C  | 3.063031  | 0.521295  | -1.317377 |
| O  | 2.056411  | -0.499231 | -1.172455 |
| C  | -3.643814 | -1.570533 | 0.373858  |
| C  | -3.742007 | 1.483007  | 0.354825  |
| H  | -3.391367 | 2.012400  | 1.247358  |
| H  | -4.064137 | 2.262404  | -0.345548 |
| C  | -4.936662 | 0.577989  | 0.714140  |
| C  | -4.488096 | -0.742793 | 1.356390  |
| H  | -5.506707 | 0.351451  | -0.196947 |
| H  | -5.359275 | -1.326664 | 1.671920  |
| H  | -4.294464 | -1.954970 | -0.425656 |
| H  | -3.901580 | -0.533294 | 2.260722  |
| H  | -5.616017 | 1.119254  | 1.381074  |
| H  | -3.216036 | -2.450314 | 0.864992  |
| Si | -0.939611 | -2.907163 | -1.536111 |
| H  | -1.461836 | -3.860782 | -0.520764 |
| H  | -1.512027 | -3.281830 | -2.857791 |
| H  | 0.535371  | -3.035809 | -1.601404 |
| Si | -1.027718 | 2.936858  | -1.493345 |
| H  | -1.495198 | 3.304260  | -2.856856 |
| H  | -1.658706 | 3.869338  | -0.520339 |
| H  | 0.444069  | 3.119206  | -1.434579 |
| H  | 0.779441  | 0.182843  | 0.576309  |
| H  | 1.214056  | -0.177733 | -0.134529 |
| C  | 4.219261  | 0.253671  | -0.385430 |
| C  | 4.840099  | 1.310502  | 0.289373  |
| C  | 4.709192  | -1.047601 | -0.211117 |
| C  | 5.939573  | 1.076271  | 1.117623  |
| H  | 4.461387  | 2.322672  | 0.167676  |
| C  | 5.801089  | -1.283414 | 0.623387  |

|   |          |           |           |
|---|----------|-----------|-----------|
| H | 4.221932 | -1.871561 | -0.723062 |
| C | 6.421630 | -0.222012 | 1.287286  |
| H | 6.411489 | 1.906067  | 1.635970  |
| H | 6.169530 | -2.296884 | 0.755062  |
| H | 7.272679 | -0.407527 | 1.936273  |
| H | 3.392910 | 0.506671  | -2.364062 |

### Int7b (Figure 7)

| Atom | X         | Y         | Z         |
|------|-----------|-----------|-----------|
| C    | -2.750443 | 0.637638  | -0.249147 |
| C    | -2.629571 | -0.772955 | -0.234537 |
| C    | -1.670535 | 1.182837  | -1.054534 |
| C    | -0.960332 | 0.061483  | -1.588748 |
| C    | -1.482473 | -1.161099 | -1.045665 |
| Fe   | -0.857330 | 0.067685  | 0.591557  |
| O    | 0.024191  | 0.208046  | -2.495545 |
| H    | 0.825223  | -0.318296 | -2.243919 |
| H    | 2.867211  | 1.208221  | -1.636819 |
| C    | -0.658745 | 1.410030  | 1.709959  |
| C    | -0.580061 | -1.180065 | 1.801658  |
| O    | -0.513012 | 2.306783  | 2.421446  |
| O    | -0.386291 | -2.012683 | 2.576887  |
| C    | 3.292925  | 0.197759  | -1.581563 |
| O    | 2.253739  | -0.777924 | -1.391404 |
| C    | -3.631173 | -1.668917 | 0.446517  |
| C    | -3.885436 | 1.379087  | 0.421090  |
| H    | -3.524930 | 1.919373  | 1.303818  |
| H    | -4.272047 | 2.144281  | -0.262471 |
| C    | -5.021476 | 0.416686  | 0.819630  |
| C    | -4.488580 | -0.878961 | 1.449666  |
| H    | -5.608256 | 0.160154  | -0.072840 |
| H    | -5.320435 | -1.503740 | 1.792305  |
| H    | -4.284986 | -2.102477 | -0.324874 |
| H    | -3.885579 | -0.637470 | 2.334778  |

Electronic Supplementary Information for Dalton Transactions  
This journal is © The Royal Society of Chemistry 2010

|    |           |           |           |
|----|-----------|-----------|-----------|
| H  | -5.705311 | 0.924438  | 1.508127  |
| H  | -3.136302 | -2.513765 | 0.936777  |
| Si | -0.951026 | -2.898445 | -1.496925 |
| H  | -1.214847 | -3.814166 | -0.357565 |
| H  | -1.727132 | -3.384906 | -2.670572 |
| H  | 0.491447  | -2.929484 | -1.832175 |
| Si | -1.296001 | 2.963507  | -1.499438 |
| H  | -1.792534 | 3.277442  | -2.866169 |
| H  | -1.995626 | 3.854103  | -0.536777 |
| H  | 0.159765  | 3.237643  | -1.444178 |
| H  | 0.631841  | 0.149103  | 0.469959  |
| H  | 1.850472  | -0.613665 | -0.516875 |
| C  | 4.355447  | 0.132915  | -0.507597 |
| C  | 4.848982  | 1.303693  | 0.078280  |
| C  | 4.871952  | -1.104089 | -0.096415 |
| C  | 5.849613  | 1.244407  | 1.050877  |
| H  | 4.446859  | 2.267159  | -0.226127 |
| C  | 5.865039  | -1.165148 | 0.879978  |
| H  | 4.481418  | -2.015387 | -0.539920 |
| C  | 6.358842  | 0.009649  | 1.454018  |
| H  | 6.222755  | 2.161097  | 1.498526  |
| H  | 6.255926  | -2.129225 | 1.193014  |
| H  | 7.132904  | -0.038967 | 2.214512  |
| H  | 3.718273  | -0.035607 | -2.563815 |

Electronic Supplementary Information for Dalton Transactions  
This journal is © The Royal Society of Chemistry 2010
